1 **Title:**

2 Comparison of muscle activity, strength and balance, before and after a 6-month training using  
3 the FIFA11+ program (part 2)

4

5 **Authors:**

6 Takeshi Oshima, M.D. Ph.D. <sup>1</sup>

7 Junsuke Nakase, M.D., Ph.D.<sup>1</sup>

8 Anri Inaki, M.D., Ph.D.<sup>2</sup>

9 Takafumi Mochizuki, M.D., Ph.D.<sup>3</sup>

10 Yasushi Takata, M.D.<sup>1</sup>

11 Kengo Shimozaki, M.D.<sup>1</sup>

12 Seigo Kinuya, M.D., Ph.D.<sup>2</sup>

13 Hiroyuki Tsuchiya, M.D., Ph.D.<sup>1</sup>

14

15 **Affiliations:**

16 1. Department of Orthopaedic Surgery, Graduate School of Medical Science, Kanazawa

17 University, 13-1 Takara-machi, Kanazawa 920-8641, Japan

18 2. Department of Nuclear Medicine/Biotracer Medicine, Graduate School of Medical Science

19 Kanazawa University, Kanazawa, Japan

20 3. Kanazawa Advanced Medical Center, Kanazawa, Japan

21

22 Corresponding author:

23 Junsuke Nakase, M.D., Ph.D.

24 Department of Orthopaedic Surgery, Graduate School of Medical Science, Kanazawa University

25 13-1 Takara-machi, Kanazawa 920-8641, Japan

26 TEL: +81-76-265-2374

27 FAX: +81-76-234-4261

28 E-mail: [nakase1007@yahoo.co.jp](mailto:nakase1007@yahoo.co.jp)

29

30 3176 words

## 31 **Abstract**

32 **Purpose:** Sports injuries can significantly impact an athlete's career, as well as impose a high  
33 financial burden on teams. Therefore, the prevention of sports injuries is an essential aspect of  
34 sports medicine. To evaluate the effects of a 6-month training period, using part 2 of the  
35 FIFA11+, on the activation and strength of core and lower limb muscles, and on static and  
36 dynamic balance performance.

37 **Materials and Methods:** Eight college male soccer players,  $20.4 \pm 0.5$  years old, completed the  
38 FIFA11+ program (part 2) at least 3x per week for 6 months. The following variables were  
39 measured, before and after the 6-month training program: activity of more than 30 muscles  
40 (with a focus on core and lower limb muscles), measured using the standardized uptake values  
41 of 18F-fluorodeoxyglucose (FDG) on positron emission tomography (PET-CT); isokinetic  
42 strength of the knee flexor and extensor and hip abductor muscles, measured at  $60^\circ/s$ ; static  
43 balance over a 60-s period, measured using a Gravicorder; and dynamic balance, measured  
44 using the Star Excursion Balance Test.

45 **Results:** Training improved activity levels of core (obliquus externus abdominis and erector  
46 spinae) and lower limb (tibialis anterior of the both legs) muscles ( $p \leq 0.03$ ), corrected the  
47 between-limb difference in activation of the semimembranosus and improved dynamic  
48 balance, with a greater training effect on the non-dominant limb ( $p \leq 0.02$ ). Training also

49 improved knee flexor force of the non-dominant lower limb ( $p=0.02$ ).

50 **Conclusion:** Routine performance of the FIFA11+ (part 2) program can improve activation of

51 core and lower limb muscles, with a concomitant improvement in dynamic balance.

## 52 **Introduction**

53 Sports injuries can significantly impact an athlete's career and the financial aspect [1].

54 Therefore, the prevention of sports injuries has received increasing attention in sports

55 medicine. Generally, sports injury prevention programs include some combination of

56 plyometric, balance and agility exercises, and have been reported to be effective in decreasing

57 the incidence of injuries, regardless of sport activity level, sex and age [2,3]. 'FIFA11+' is one of

58 the most effective prevention programs, which the Fédération Internationale de Football

59 Association (FIFA) Medical and Assessment Research Center (F-MARC) has developed. The

60 FIFA11+ consists of three parts: basic running (part 1); 3 levels of difficulty of 6 exercises

61 aiming to increase strength (core and lower limbs), balance, muscle control (plyometrics), and

62 core stability (part 2); and running such as straight line running, or cutting activities (part 3).

63 Improvement and evaluation of the effectiveness of an injury prevention program

64 requires assessment of not only the change in the incidence rate of injury, but also the short-

65 and long-term effects of the training on modifying muscle activity patterns and improving,

66 strength and balance.

67 To evaluate the muscle activities, electromyography (EMG) has principally been used.

68 However, EMG can only provide information on the activation of superficial muscles, and not

69 of deep muscles of the trunk and limbs, is limited with regard to the number of muscles that  
70 can be assessed simultaneously (namely those on which superficial sensors can be placed) and  
71 requires equipment to be attached to the body, which is difficult during performance of sports  
72 activities.

73 Previous studies have used whole-body positron emission tomography - computed  
74 tomography (PET-CT) to quantify the change in muscle activity after performing the FIFA11+  
75 (part 2) program, with glucose uptake in skeletal muscles being used as a proxy measure of the  
76 level of muscle activity [4,5]. Unlike EMG, PET-CT provides a non-invasive observation of the  
77 activity of muscles throughout the body, simultaneously, with the possibility of 3-dimensional  
78 (3D) image reconstruction. As active muscle cells exhibit increased glucose uptake, the use of  
79 <sup>18</sup>F-fluorodeoxyglucose (FDG), a deoxy analog of glucose, permits the observation of glucose  
80 metabolism of the skeletal muscles throughout the body. However, unlike glucose, FDG does  
81 not continue along the usual glycolytic pathway but, rather, accumulates within exercising  
82 muscle tissue. This metabolic trapping process forms the basis of FDG-PET. The accumulation  
83 of FDG in muscle provides a parameter of glucose intake by muscles and, therefore, of the  
84 intensity of muscle activity [6]. To our knowledge, FDG-PET is the only method that can  
85 provide a reliable cumulative index of muscle activity for between-muscle comparison, which  
86 is invaluable for the assessment of sports injuries. As such, FDG-PET would be effective to

87 measure the effects of the FIFA11+ program.

88           In recent years, various benefits of the entire FIFA11+ program have been reported,  
89 including a reduction in the incidence of sports injuries and improvement in the  
90 neuromuscular control and strength of flexor muscles [7,8]. A review of the studies reporting  
91 on the acute or chronic effects of the FIFA11+ on performance and physiological measures  
92 among football players, an intervention period of 9-10 weeks yielded positive effects [9].  
93 However, the effect of a long-term, routine, performance of the FIFA11+ program on the  
94 metabolism of skeletal muscles remains to be clearly defined. Therefore, the aim of our study  
95 was to investigate the change in muscle activity, and muscle strength and dynamic balance,  
96 after performing part 2 of the FIFA11+ for 6 months. The a priori hypothesis was that the  
97 FIFA11+ (part 2) program would be effective in increasing the activity of core and lower limb  
98 muscles, improve muscle strength of the lower limb and improve static and dynamic balance.

## 99 **Materials and Methods**

100           Our study group was formed of 8 collegiate male soccer players. All participants were  
101 considered to be healthy, based on their medical history and physical examination, and none  
102 were taking medication at the time of the study. All participants provided informed consent,  
103 and the study was approved by our Institutional Ethics Review Board.

104           Participants were asked to avoid strenuous physical activity for at least one day prior  
105 to testing, and to refrain from eating and drinking for at least 6 h before testing. PET-CT images  
106 were obtained as per previously described methods [4,5]. After obtaining baseline  
107 (pre-training) PET-CT images, participants completed the training protocol, consisting of  
108 completing part 2 of the FIFA11+ program,  $\geq 3$  times per week, for 6 consecutive months.  
109 PET-CT images were obtained at the end of the training period, using the same protocol as at  
110 baseline.

111           Regions of interest (ROI) on the images were manually segmented in 30 skeletal  
112 muscles, located in 5 areas of the body: trunk, pelvis, thigh, lower leg, and the foot. (Table 1)  
113 All ROIs were identified by one experienced nuclear medicine specialist, who was blinded from  
114 all other results, from the plain CT images obtained concurrently. The standardized uptake  
115 value (SUV) of FDG was calculated by overlapping the defined ROI and fusion PET-CT images to  
116 outline the area of muscles, being careful to not include large vessels. The FDG uptake was



117 normalized to the unit volume of muscle as follows: {mean ROI count (counts per second/pixel)  
118 × calibration factor (counts per second /Bq)}/{injected dose (Bq)/body weight (g)}. ROIs were  
119 defined for the skeletal muscles previously described, bilaterally, and the mean SUV was  
120 compared for the dominant and non-dominant side of the body (where the dominant side was  
121 identified by asking participants which leg they used to kick a ball). The mean SUV for the trunk  
122 was calculated as follows:  $([\text{left mean SUV} \times \text{left muscle area}] + [\text{right mean SUV} \times \text{right muscle}$   
123  $\text{area}])/(\text{left muscle area} + \text{right muscle area})$ . FDG accumulation was compared between the  
124 pre- and post-training PET-CT examinations.

125 Balance and muscle strength testing was performed by experienced physical  
126 therapists. These assessments were performed one week after the PET analysis, with balance  
127 tests preceding strength tests to avoid effects of muscle fatigue.

128 Static balance was measured using a Gravicorder. Postural sway, for 60 s, at a  
129 sampling rate of 20-Hz sampling, under the following conditions: two-leg stance with eyes  
130 open and then with eyes closed; single leg (dominant) standing with eyes open; and single leg  
131 (non-dominant) standing with eyes open. All measurements were obtained in bare feet, using  
132 the center of the force platform as a reference point. Two variables of balance were measured,  
133 the locus length per time (LG), providing a measure of attitude control, and the environmental  
134 area (AR), providing a measure of equilibrium control [10]. These two parameters have been

135 used to assess dizziness and equilibrium disorders and, more recently, to quantify balance  
136 effects on anterior cruciate ligament injury [11]. All balance measurements were repeated  
137 twice, with a 1-min rest between measurements; data from the second measurement, which  
138 has been reported to be more accurate [12], used for analysis.

139           Dynamic postural control was evaluated using the Star Excursion Balance Test (SEBT).  
140 Participants were asked to reach as far as possible along the designated line for each of the  
141 following 8 directions: anterolateral, anterior, anteromedial, medial, posteromedial, posterior,  
142 posterolateral, and lateral. (Fig 1) The test was performed twice, once in a clockwise direction  
143 (reaching with the right leg) and once in a counterclockwise direction (reaching with the left  
144 leg). The average of the length of three reaches performed in each direction was used for  
145 analysis, with the distance normalized to the length of the leg (measured from the anterior  
146 superior iliac spine to the distal tip of the medial malleolus). The greater the normalized length  
147 of excursion, the better the dynamic balance.

148           The maximal knee flexion and extension muscle strength and the maximal isokinetic  
149 hip abductor strength were tested using an isokinetic Biodex system. After 10-min warm-up,  
150 knee strength measurements were obtained in the sitting position, and the hip abductor  
151 strength was obtained in a sidelying position. For the strength testing, participants were asked  
152 to move the knee and hip at full force, with 3 trials performed for each direction at a speed of

153 60°/s. For all strength measurements, the average value of the 3 trials was used for analysis,  
154 and values were normalized to body weight (pre- and post-training) for between-subject  
155 comparisons. The ratio of the strong-to-weaker leg was calculated as an index of between-limb  
156 strength imbalance, converted to a percentage difference, using a previously described  
157 method based on log-transformed raw data, followed by back transformation [13].

158 All statistical analyses were performed using Stata for Mac Version 15 (Stata  
159 Statistical Software 2017; Stata Corp LLC, College Station, TX, USA). All data are presented as  
160 mean (SD). The Shapiro-Wilk test was used to evaluate the normality of distribution. Wilcoxon  
161 signed rank test was used to evaluate differences in the mean SUV and static balance, before  
162 and after training, with a paired t-test used to evaluate the differences in muscle strength and  
163 dynamic balance. The minimum significance level was set at  $P < 0.05$ . The sample size was  
164 confirmed using a power analysis of 0.8, with an  $\alpha$  value of 0.05 and effect size of 1.0.

165

166 **Fig 1:** Reaching directions on the Star Excursion Balance Test

167

168

## 169 Results

170 The relevant characteristics of the participants at pre-training are as follows: age;  
171 20.4±0.5 years old, height; 175.4±6.2 cm, weight; 68.6±5.1 kg, 22.3±1.3 kg/m<sup>2</sup>, and the leg  
172 length; 89.4±3.8 cm. After training, the weight was 70.1±4.6 kg (p= 0.246) and the body mass  
173 index was 22.8±0.8 kg/m<sup>2</sup> (p= 0.250), and there was no significant difference pre- and  
174 post-training.

175 Representative whole-body PET images, pre- and post-training, are shown in Fig 2  
176 with the mean SUVs reported in Table 1. A significant pre- to post-training increase in the  
177 mean SUV was identified for two core muscles, the obliquus externus abdominis (0.75±0.26  
178 *versus* 1.06±0.38, respectively, p= 0.036) and erector spinae (0.67±0.16 *versus* 0.80±0.31,  
179 respectively, p=0.025). The pre- to post-training significant change in the mean SUVs for the  
180 muscles of the dominant and non-dominant lower limbs, from the pelvis to the foot, are  
181 detected. For the dominant lower limb, the mean SUV increased for the tibialis anterior  
182 (1.06±0.59 *versus* 1.53 ±0.86, respectively, p=0.017) and decreased for the triceps surae  
183 (1.39±0.40 *versus* 0.88±0.19, respectively, p=0.017). A similar result was identified for the  
184 non-dominant lower limb, with an increase in the tibialis anterior (1.00±0.36 *versus* 1.44±0.66,  
185 respectively, p=0.025) and a decrease for the triceps surae (1.24±0.25 *versus* 0.86±0.18,  
186 respectively, p=0.025). The significant side-to-side difference of SUV was detected in

187 semimembranosus in pre-training. Pre-training, the mean SUV of the semimembranosus  
188 muscle was higher for the dominant than non-dominant lower limb ( $0.74\pm 0.14$  versus  
189  $0.59\pm 0.10$ , respectively,  $p=0.012$ ). Of note, no significant difference in the activation of the  
190 semimembranosus between the dominant and non-dominant side was observed after training.

191           The mean LG and AR values are reported in Table 2, with no significant difference  
192 between pre- and post-training values. The reach distance along the 8 directions for the  
193 dominant and non-dominant lower limbs are reported in the Table 3. For the dominant leg,  
194 the standing reach distance increased significantly, pre- to post-training, in the anterior-lateral  
195 direction ( $70.9\pm 9.2$  cm to  $74.9\pm 9.6$  cm,  $p=0.023$ ). A greater improvement in dynamic balance  
196 on the non-dominant leg was observed, with an increase in the reach distance across multiple  
197 directions, as follows: medial ( $103.6\pm 6.0$  cm to  $107.9\pm 7.6$  cm,  $p=0.002$ ); posterior-medial  
198 ( $111.4\pm 6.0$  cm to  $115.3\pm 6.6$  cm,  $p=0.030$ ); and posterior ( $114.0\pm 4.5$  cm to  $119.1\pm 7.9$  cm,  
199  $p=0.022$ ). The pre- to post-training changes in muscle strength are reported in Table 4. For the  
200 non-dominant leg, knee flexion force increased from  $1.24\pm 0.15$  Nm/kg to  $1.39\pm 0.14$  Nm/kg  
201 ( $p=0.023$ ). No effects of training on knee extensor and hip abductor strength were noted, nor  
202 on the hamstring-to-quadriceps ratio or between-limb imbalance index (Table 5).

203 **Fig 2:** Representative whole-body positron emission tomography images acquired before (left)  
204 and after (right) routine performance of the FIFA11+.

205 Table 1: Mean SUVs during pre- and post-training. SUV, standardized uptake value

| Body area | Muscles                     | Pre-training SUV |                  | Post-training SUV |                  |
|-----------|-----------------------------|------------------|------------------|-------------------|------------------|
|           |                             | Dominant leg     | Non-dominant leg | Dominant leg      | Non-dominant leg |
| Trunk     | Rectus abdominis            | 0.90±0.35        |                  | 1.03±0.40         |                  |
|           | Obliquus externus abdominis | 0.75±0.26        |                  | 1.06±0.38         |                  |
|           | Obliquus internus abdominis | 0.69±0.14        |                  | 0.76±0.81         |                  |
|           | Transversus abdominis       | 0.62±0.08        |                  | 0.59±0.14         |                  |
|           | Psoas major                 | 0.94±0.31        |                  | 0.87±0.20         |                  |
|           | Quadratus lumborum          | 0.85±0.33        |                  | 0.99±0.32         |                  |
|           | Erector spinae              | 0.67±0.16        |                  | 0.80±0.31         |                  |
| Pelvis    | Gluteus maximus             | 1.54±0.78        | 1.25±0.78        | 1.27±0.29         | 1.17±0.29        |
|           | Gluteus medius              | 2.18±1.17        | 2.29±0.82        | 2.79±1.93         | 2.46±0.31        |
|           | Gluteus minimus             | 3.13±0.60        | 3.51±0.83        | 3.51±1.20         | 3.34±0.98        |
|           | Piriformis                  | 2.95±1.70        | 2.37±0.88        | 2.13±0.74         | 1.99±0.65        |
| Thigh     | Quadriceps femoris          | 1.00±0.31        | 1.01±0.38        | 1.00±0.30         | 0.92±0.19        |

|           |                         |           |           |           |           |
|-----------|-------------------------|-----------|-----------|-----------|-----------|
|           | Sartorius               | 0.76±0.21 | 0.77±0.20 | 0.91±0.32 | 0.89±0.27 |
|           | Gracilis                | 1.16±0.43 | 1.14±0.40 | 1.26±0.43 | 1.32±0.64 |
|           | Semimembranosus         | 0.74±0.14 | 0.59±0.10 | 0.62±0.08 | 0.60±0.12 |
|           | Semitendinosus          | 1.19±0.31 | 1.09±0.30 | 1.41±0.48 | 1.23±0.52 |
|           | Biceps femoris          | 0.59±0.08 | 0.63±0.10 | 0.61±0.10 | 0.62±0.13 |
|           | Adductor complex        | 0.81±0.18 | 0.82±0.18 | 0.83±0.14 | 0.76±0.15 |
| Lower leg | Tibialis anterior       | 1.06±0.59 | 1.00±0.36 | 1.53±0.86 | 1.44±0.66 |
|           | Flexor digitorum longus | 1.28±0.26 | 1.20±0.35 | 0.90±0.35 | 0.96±0.35 |
|           | Tibialis posterior      | 1.34±0.84 | 1.37±0.79 | 1.05±0.30 | 1.13±0.51 |
|           | Flexor hallucis longus  | 1.23±0.13 | 1.30±0.58 | 1.10±0.29 | 1.18±0.49 |
|           | Peroneus                | 1.50±0.89 | 1.32±0.36 | 1.13±0.61 | 1.21±0.52 |
|           | Triceps surae           | 1.39±0.40 | 1.24±0.25 | 0.88±0.19 | 0.86±0.18 |
| Foot      | Abductor hallucis       | 1.36±0.42 | 1.45±0.44 | 1.31±0.61 | 1.17±0.37 |
|           | Quadratus plantae       | 1.06±0.20 | 1.29±0.43 | 1.05±0.38 | 1.00±0.34 |
|           | Flexor digitorum brevis | 1.43±0.42 | 1.61±0.58 | 1.68±1.49 | 1.49±0.67 |

|  |                        |           |           |           |           |
|--|------------------------|-----------|-----------|-----------|-----------|
|  | Abductor digiti minimi | 1.13±0.44 | 1.45±0.55 | 1.15±0.50 | 1.31±0.78 |
|  | Flexor hallucis brevis | 2.12±0.65 | 2.24±0.57 | 2.27±0.83 | 2.12±0.90 |
|  | Interosseous           | 2.02±0.61 | 2.20±1.11 | 2.38±1.50 | 2.20±1.31 |

206



207 Table 2: Static balance parameter, pre- and post-training.

208

|                       | conditions                    | pre-training | post-training | Confidence interval | Effect size | P value |
|-----------------------|-------------------------------|--------------|---------------|---------------------|-------------|---------|
| LG (cm/s)             | Two-leg, eyes opened          | 0.94±0.11    | 1.05±0.14     | [-0.04, 0.27]       | 0.904       | 0.12    |
|                       | Two-leg, eyes closed          | 1.41±0.28    | 1.27±0.23     | [-0.39, 0.11]       | 0.533       | 0.36    |
|                       | Dominant leg, eyes opened     | 3.93±0.61    | 3.96±0.67     | [-0.44, 0.51]       | 0.052       | 0.78    |
|                       | Non-dominant leg, eyes opened | 3.88±0.68    | 4.03±0.31     | [-0.48, 0.79]       | 0.195       | 0.40    |
| AR (cm <sup>2</sup> ) | Two-leg, eyes opened          | 1.69±0.64    | 1.81±0.40     | [-0.44, 0.69]       | 0.181       | 0.48    |
|                       | Two-leg, eyes closed          | 2.65±0.37    | 2.46±0.82     | [-1.01, 0.62]       | 0.198       | 0.78    |
|                       | Dominant leg, eyes opened     | 6.84±2.77    | 7.24±1.56     | [-2.30, 3.11]       | 0.124       | 0.78    |
|                       | Non-dominant leg, eyes opened | 6.91±2.66    | 7.45±1.99     | [-2.10, 3.18]       | 0.177       | 0.67    |

209 Table 3: Reach distance (excursion distance/leg length×100) by balance condition and direction of reach, pre- and post-training.

210

211

| Direction (cm)    | Dominant leg     |                   |                        |             | Non-dominant leg |                   |                        |                 |
|-------------------|------------------|-------------------|------------------------|-------------|------------------|-------------------|------------------------|-----------------|
|                   | Pre-trainin<br>g | Post-traini<br>ng | Confidence<br>interval | P value     | Pre-trainin<br>g | Post-traini<br>ng | Confidence<br>interval | P value         |
| anterior-lateral  | <b>70.9±9.2</b>  | <b>74.9±9.6</b>   | <b>[0.74, 7.2]</b>     | <b>0.02</b> | 76.9±9.9         | 75.3±9.3          | [-7.3, 4.0]            | 0.51            |
| anterior          | 86.4±8.3         | 86.6±6.9          | [-1.3, 1.7]            | 0.75        | 86.9±7.5         | 88.1±7.4          | [-0.08, 2.5]           | 0.06            |
| anterior-medial   | 95.5±7.3         | 95.0±6.6          | [-3.8, 3.0]            | 0.77        | 94.8±4.7         | 97.3±8.0          | [-0.81, 6.0]           | 0.11            |
| medial            | 103.4±7.2        | 105.0±7.3         | [-1.3, 4.5]            | 0.23        | <b>103.6±6.0</b> | <b>107.9±7.6</b>  | <b>[2.2, 6.3]</b>      | <b>&lt;0.01</b> |
| posterior-medial  | 112.5±6.9        | 113.6±7.9         | [-1.5, 3.6]            | 0.35        | <b>111.4±6.0</b> | <b>115.3±6.6</b>  | <b>[0.49, 7.3]</b>     | <b>0.03</b>     |
| posterior         | 115.7±6.4        | 117.4±7.0         | [-2.9, 6.4]            | 0.40        | <b>114.0±4.5</b> | <b>119.1±7.9</b>  | <b>[1.0, 9.1]</b>      | <b>0.02</b>     |
| posterior-lateral | 106.4±7.3        | 108.9±9.0         | [-5.0, 10.1]           | 0.45        | 106.1±6.6        | 109.9±8.9         | [-2.8, 10.3]           | 0.22            |
| lateral           | 97.7±8.7         | 97.1±13.3         | [-8.3, 7.1]            | 0.86        | 94.8±7.8         | 97.5±7.8          | [-2.1, 7.5]            | 0.22            |

212 Table 4: Pre- to post-training change in lower limb muscle strength.

213

214

215

|                   | pre-training | post-training | Confidence interval | Effect size | P value |
|-------------------|--------------|---------------|---------------------|-------------|---------|
| Knee flexor (%)   | 17.0±22.3    | 6.5±4.9       | [-28.5, 7.52]       | 0.487       | 0.22    |
| Knee extensor (%) | 12.5±8.2     | 12.3±8.6      | [-10.7, 10.3]       | 0.016       | 0.96    |
| Hip abductor (%)  | 9.9±7.9      | 6.7±5.0       | [-10.5, 4.0]        | 0.373       | 0.33    |
| H/Q ratio (%)     | 17.5±5.8     | 10.6±8.4      | [-16.4, 2.7]        | 0.596       | 0.14    |

216 Table 5: Between-limb muscle strength imbalance, pre- and post-training.

217

218

|                       | Dominant leg |               |                     |             |         | Non-dominant leg |                  |                     |              |             |
|-----------------------|--------------|---------------|---------------------|-------------|---------|------------------|------------------|---------------------|--------------|-------------|
|                       | pre-training | post-training | Confidence interval | Effect size | P value | pre-training     | post-training    | Confidence interval | Effect size  | P value     |
| Knee flexor (Nm/kg)   | 2.90±0.09    | 2.99±0.18     | [-0.47, 6.44]       | 0.134       | 0.72    | 2.78±0.17        | 2.98±0.13        | [-0.10, 0.50]       | 0.550        | 0.16        |
| Knee extensor (Nm/kg) | 1.31±0.20    | 1.41±0.21     | [-0.15, 0.34]       | 0.338       | 0.37    | <b>1.24±0.15</b> | <b>1.39±0.14</b> | <b>[0.03, 0.28]</b> | <b>1.026</b> | <b>0.02</b> |
| Hip abductor (Nm/kg)  | 2.41±0.41    | 2.40±0.35     | [-0.41, 0.38]       | 0.031       | 0.21    | 2.35±0.37        | 2.52±0.43        | [-0.05, 0.39]       | 0.634        | 0.55        |
| H/Q ratio (%)         | 0.45±0.05    | 0.48±0.07     | [-0.02, 0.08]       | 0.454       | 0.16    | 0.46±0.09        | 0.48±0.09        | [-0.05, 0.09]       | 0.220        | 0.78        |

219

220

## 221 Discussion

222 Our results indicate an increase in the activation of various skeletal muscles of the  
223 core and lower limbs after a 6-month training using part 2 of the FIFA 11+ program, measured  
224 as an increase in the uptake of glucose: obliquus externus abdominis, erector spinae and  
225 tibialis anterior. Of note was the decrease in the glucose uptake of the triceps surae, as glucose  
226 uptake increased in the tibialis anterior. We also noted an improvement in the imbalance of  
227 the glucose uptake in the semimembranosus, between the dominant and non-dominant, after  
228 training. From a functional perspective, training produced a greater improvement in dynamic  
229 balance on the non-dominant than dominant lower limb. To our knowledge, this is the first  
230 study to report changes in muscle activities, associated with improvements in balance and  
231 muscle strength, after long-term training using the part 2 of the FIFA 11+ program. Observed  
232 changes in glucose uptake, balance and strength would, therefore, be the key mechanisms  
233 explaining the association between the FIFA 11+ and a decrease in sports-related injuries.

234 Glucose enters the muscle cell by facilitated diffusion via the glucose transporter-4  
235 (GLUT4), with exercise stimulating an increase in the expression of GLUT4 in skeletal muscles,  
236 as shown by the findings of Reichkender et al. after an 11-week program of daily moderate-  
237 and high-dose aerobic exercise [14]. Similarly, an increase in GLUT4 levels in skeletal muscles is  
238 a key adaptation to regular exercise training [15]. Thus, FDG accumulation in the muscle can be  
239 used as a measure of the change in glucose uptake with training, as well as providing a proxy  
240 measure of muscle activity [16].

241 By comparing the change in FDG accumulation of each muscle from pre- to  
242 post-training, we demonstrated that routine training using part 2 of the FIFA11+ program  
243 improved muscle metabolism and activation as well as the previous studies [4,5]. These  
244 adaptations are important when we consider the positive effects of core and lower limb

245 strength on balance. Kaji et al. reported on the improvement in two-leg standing balance with  
246 eyes closed after performing the FIFA11+ program ( $p=0.005$ ) [17]. Granacher et al. reported on  
247 the improvement in the Functional Reach test ( $p<0.05$ ) after performing a core stability  
248 training program which increased the strength of the trunk flexors ( $p<0.001$ ), extensors  
249 ( $p<0.001$ ) and lateral flexors ( $p<0.001$ ) [18]. In the same way, Imai et al. reported immediate  
250 improvements in the posteromedial ( $p<0.001$ ) and posterolateral directions ( $p=0.002$ ) of the  
251 SEBT after the trunk stabilization exercises [19]. Considering the effect of core stability on  
252 balance, Willson et al. suggested that appropriate core strength training could reduce  
253 sports-related injuries [20]. We reported similar findings, showing an increase in the mean  
254 SUVs of the obliquus externus abdominis and erector spinae muscles after training, with a  
255 concomitant improvement in dynamic balance, indicative of the effectiveness of the part 2  
256 FIFA11+ program in improving core strength.

257           With regard to lower limb muscle activation, Day et al. reported an increase activity  
258 of the tibialis anterior during active swaying (compared to static standing), which they  
259 associated to the higher proprioceptive demands of balancing under more challenging sensory  
260 conditions and the proprioceptive role of the tibialis anterior [21]. Similarly, Earl et al. reported  
261 an increase in the general activity of lower limb muscles (vastus medialis obliquus, vastus  
262 lateralis, medial hamstring, biceps femoris, and tibialis anterior) during the SEBT ( $p<0.05$ ), with  
263 the exception of the triceps surae muscles ( $p=0.08$ ) [22]. We demonstrated comparable  
264 findings post-training, supporting the effectiveness of the FIFA11+ (part 2) in improving  
265 balance [8].

266           The balance of muscle strength is also an important component with regard to injury  
267 prevention. For the lower limb, the hamstring-to-quadriceps ratio is an important risk factor of  
268 injury [23]. Previous studies have reported on the effectiveness of the complete FIFA 11+

269 program in improving knee flexor strength and, thus, the hamstring-to-quadriceps ratio [7].  
270 Between-limb strength imbalances might also be an important risk factor for lower leg injury  
271 [24]. A prospective study provided evidence that a between-limb imbalance in eccentric knee  
272 flexor strength increase in the risk of hamstring injuries [25]. Although we reported the  
273 effectiveness of the training in eliminating the higher SUV of the semimembranosus muscles in  
274 the dominant than non-dominant lower limb observed pre-training, we did not identify a  
275 significant between-limb imbalance among our study participants, either pre- or post-training.  
276 Therefore, we cannot stipulate if the FIFA11+ (part 2) program is effective to improve lower  
277 limb muscle imbalances, although the results of our SUV analysis indicate that the program  
278 would likely be of benefit in this regard.

279 Overall, our findings are consistent with previous reports on the effectiveness of  
280 performing the complete FIFA 11+ program in improving balance and muscle strength, which  
281 lowered the incidence of sports injuries [7–9]. The methods we used, and PET-CT in particular,  
282 could be useful for evaluating the effectiveness of training programs and identifying the  
283 underlying pathways.

284 We note the following limitations of our study. First, the FDG-PET method accounts  
285 only for muscle glucose uptake. Other substrates, such as free fatty acids, muscle glycogen and  
286 lactate, are also metabolized in active muscle cells. That being said, studies have confirmed  
287 that glucose oxidation increases with exercise intensity and increases in glucose uptake, to  
288 some extent, increases in proportion with glycogen utilization as exercise intensity increases. A  
289 second limitation was the method we used to define the ROI. Since FDG uptake was measured  
290 at an arbitrary site on the target muscle, it did not reflect the uptake of glucose for the entire  
291 muscle. Lastly, taking into consideration the ethical dilemma of radiation exposure with CT  
292 (even though the amount of FDG was <10% of normal PET examination), our study sample was

293 small and we did not include a control group. Our use of PET-CT was consistent with the aim of  
294 our study to confirm that improvements in muscle metabolism was an important underlying  
295 pathway for the previously reported effectiveness of the FIFA11+ training program. In this  
296 sense, our use of PET-CT and our findings of an increase in glucose uptake post-training are  
297 novel.

298

## 299 **Conclusions**

300 Routinely performing part 2 of the FIFA11+ program for 6 months increased glucose  
301 uptake, related to muscle activity, of the obliquus externus abdominis, erector spinae and  
302 tibialis anterior, while decreasing activation of the triceps surae. The training program also  
303 improved knee flexor strength and dynamic balance, with no effect identified on static  
304 balance. We speculate that these improvements could be beneficial in lower the risk of  
305 sports-related injuries.

306

## 307 **Acknowledgments**

308 The authors would like to express their appreciation for the outstanding efforts  
309 positive attitude of the participants. In addition, they are extremely grateful for the technical  
310 assistance with measurement provided by physical therapists of our hospital.

311 No financial assistance was received for the project.

312

## 313 **Author Contributions**

314 Conceptualization: Takeshi Oshima, Junsuke Nakase.

315 Data curation: Takeshi Oshima, Anri Inaki.



316 Formal analysis: Takeshi Oshima, Anri Inaki, Takafumi Mochizuki.  
317 Investigations: Takeshi Oshima, Yasushi Takata, Kengo Shimozaki.  
318 Methodology: Takeshi Oshima, Anri Inaki, Takafumi Mochizuki, Junsuke Nakase.  
319 Project administration: Seigo Kinuya, Hiroyuki Tsuchiya.  
320 Resources: Takeshi Oshima, Yasushi Takata, Kengo Shimozaki, Junsuke Nakase.  
321 Supervision: Seigo Kinuya, Hiroyuki Tsuchiya.  
322 Validation: Takeshi Oshima, Anri Inaki, Takafumi Mochizuki.  
323 Writing- original paper: Takeshi Oshima.  
324 Writing- review and editing: Junsuke Nakase, Seigo Kinuya, Hiroyuki Tsuchiya.

325

## 326 **Conflict of interest statement**

327 This research didn't receive grants from any funding agency in the public, commercial  
328 or not-for-profit sectors.

329

## 330 **Ethical approval**

331 This study was approved by the ethics committee of Kanazawa University (approval  
332 number: 1286).

## 333   **References**

- 334    1.     Junge A, Lamprecht M, Stamm H, Hasler H, Bizzini M, Tschopp M, et al. Countrywide  
335            Campaign to Prevent Soccer Injuries in Swiss Amateur Players. *Am J Sports Med.*  
336            2011;39: 57–63. doi:10.1177/0363546510377424
- 337    2.     Mandelbaum BR, Silvers HJ, Watanabe DS, Knarr JF, Thomas SD, Griffin LY, et al.  
338            Effectiveness of a Neuromuscular and Proprioceptive Training Program in Preventing  
339            Anterior Cruciate Ligament Injuries in Female Athletes. *Am J Sports Med.* 2005;33:  
340            1003–1010. doi:10.1177/0363546504272261
- 341    3.     Zebis MK, Andersen LL, Brandt M, Myklebust G, Bencke J, Lauridsen HB, et al. Effects of  
342            evidence-based prevention training on neuromuscular and biomechanical risk factors  
343            for ACL injury in adolescent female athletes: a randomised controlled trial. *Br J Sports*  
344            *Med.* 2016;50: 552–557. doi:10.1136/bjsports-2015-094776
- 345    4.     Nakase J, Inaki A, Mochizuki T, Toratani T, Kosaka M, Ohashi Y, et al. Whole Body  
346            Muscle Activity during the FIFA 11+ Program Evaluated by Positron Emission  
347            Tomography. Chen C-T, editor. *PLoS One.* 2013;8: e73898.  
348            doi:10.1371/journal.pone.0073898
- 349    5.     Takata Y, Nakase J, Inaki A, Mochizuki T, Numata H, Oshima T, et al. Changes in muscle  
350            activity after performing the FIFA 11+ programme part 2 for 4 weeks. *J Sports Sci.*  
351            2016;34. doi:10.1080/02640414.2016.1149606
- 352    6.     Ohnuma M, Sugita T, Kokubun S, Yamaguchi K, Rikimaru H. Muscle activity during a  
353            dash shown by<sup>18</sup>F-fluorodeoxyglucose positron emission tomography. *Journal of*  
354            *Orthopaedic Science.* 2006. pp. 42–45. doi:10.1007/s00776-005-0972-y
- 355    7.     Impellizzeri FM, Bizzini M, Dvorak J, Pellegrini B, Schena F, Junge A. Physiological and  
356            performance responses to the FIFA 11+ (part 2): a randomised controlled trial on the

- 357 training effects. *J Sports Sci.* 2013;31: 1491–1502. doi:10.1080/02640414.2013.802926
- 358 8. Daneshjoo A, Mokhtar AH, Rahnema N, Yusof A. The Effects of Comprehensive  
359 Warm-Up Programs on Proprioception, Static and Dynamic Balance on Male Soccer  
360 Players. Lucia A, editor. *PLoS One.* 2012;7: e51568. doi:10.1371/journal.pone.0051568
- 361 9. Barengo N, Meneses-Echávez J, Ramírez-Vélez R, Cohen D, Tovar G, Bautista J. The  
362 Impact of the FIFA 11+ Training Program on Injury Prevention in Football Players: A  
363 Systematic Review. *Int J Environ Res Public Health.* 2014;11: 11986–12000.  
364 doi:10.3390/ijerph111111986
- 365 10. Okuda K, Abe N, Katayama Y, Senda M, Kuroda T, Inoue H. Effect of vision on postural  
366 sway in anterior cruciate ligament injured knees. *J Orthop Sci.* 2005;10: 277–283.  
367 doi:10.1007/s00776-005-0893-9
- 368 11. Oshima T, Nakase J, Kitaoka K, Shima Y, Numata H, Takata Y, et al. Poor static balance is  
369 a risk factor for non-contact anterior cruciate ligament injury. *Arch Orthop Trauma*  
370 *Surg.* 2018;138: 1713–1718. doi:10.1007/s00402-018-2984-z
- 371 12. Demura S, Yamaji S, Noda M, Kitabayashi T, Nagasawa Y. Examination of Parameters  
372 Evaluating the Center of Foot Pressure in Static Standing Posture from the Viewpoints  
373 of Trial-to-trial Reliability and Interrelationships Among Parameters. *Equilib Res.*  
374 2001;60: 44–55. doi:10.3757/jser.60.44
- 375 13. Impellizzeri FM, Bizzini M, Rampinini E, Cereda F, Maffiuletti NA. Reliability of isokinetic  
376 strength imbalance ratios measured using the Cybex NORM dynamometer. *Clin Physiol*  
377 *Funct Imaging.* 2008;28: 113–119. doi:10.1519/JSC.0b013e3181c06bdd
- 378 14. Reichkender MH, Auerbach P, Rosenkilde M, Christensen AN, Holm S, Petersen MB, et  
379 al. Exercise training favors increased insulin-stimulated glucose uptake in skeletal  
380 muscle in contrast to adipose tissue: a randomized study using FDG PET imaging. *Am J*

- 381           Physiol Metab. 2013;305: E496–E506. doi:10.1152/ajpendo.00128.2013
- 382   15.   Richter EA, Hargreaves M. Exercise, GLUT4, and Skeletal Muscle Glucose Uptake.  
383           Physiol Rev. 2013;93: 993–1017. doi:10.1152/physrev.00038.2012
- 384   16.   Bojsen-Møller J, Kalliokoski KK, Seppänen M, Kjaer M, Magnusson SP. Low-intensity  
385           tensile loading increases intratendinous glucose uptake in the Achilles tendon  
386           [Internet]. Journal of Applied Physiology. 2006. pp. 196–201.  
387           doi:10.1152/jappphysiol.00004.2006
- 388   17.   Kaji A, Sasagawa S, Kubo T, Kanehisa H. Transient Effect of Core Stability Exercises on  
389           Postural Sway During Quiet Standing. J Strength Cond Res. 2010;24: 382–388.  
390           doi:10.1519/JSC.0b013e3181c06bdd
- 391   18.   Granacher U, Lacroix A, Muehlbauer T, Roettger K, Gollhofer A. Effects of Core  
392           Instability Strength Training on Trunk Muscle Strength, Spinal Mobility, Dynamic  
393           Balance and Functional Mobility in Older Adults. Gerontology. 2013;59: 105–113.  
394           doi:10.1159/000343152
- 395   19.   Imai A, Kaneoka K, Okubo Y, Shiraki H. Comparison of the immediate effect of different  
396           types of trunk exercise on the star excursion balance test in male adolescent. The  
397           International Journal of Sports Physical Therapy. 2014. pp. 428–435.
- 398   20.   Willson JD, Dougherty CP, Ireland ML, Davis IM. Core Stability and Its Relationship to  
399           Lower Extremity Function and Injury. J Am Acad Orthop Surg. 2005;13: 316–325.  
400           doi:10.5435/00124635-200509000-00005
- 401   21.   Day JT, Lichtwark GA, Cresswell AG. Tibialis anterior muscle fascicle dynamics  
402           adequately represent postural sway during standing balance. J Appl Physiol. 2013;115:  
403           1742–1750. doi:10.1152/jappphysiol.00517.2013
- 404   22.   Earl JE, Hertel J. Lower-Extremity Muscle Activation during the Star Excursion Balance

- 405 Tests. *J Sport Rehabil.* 2001;10: 93–104. doi:10.1123/jsr.10.2.93
- 406 23. Croisier J-L, Ganteaume S, Binet J, Genty M, Ferret J-M. Strength Imbalances and  
407 Prevention of Hamstring Injury in Professional Soccer Players. *Am J Sports Med.*  
408 2008;36: 1469–1475. doi:10.1177/0363546508316764
- 409 24. Yeung SS, Suen AMY, Yeung EW. A prospective cohort study of hamstring injuries in  
410 competitive sprinters: preseason muscle imbalance as a possible risk factor. *Br J Sports*  
411 *Med.* 2009;43: 589–594. doi:10.1136/bjism.2008.056283
- 412 25. Bourne MN, Opar DA, Williams MD, Shield AJ. Eccentric Knee Flexor Strength and Risk  
413 of Hamstring Injuries in Rugby Union. *Am J Sports Med.* 2015;43: 2663–2670.  
414 doi:10.1177/0363546515599633
- 415

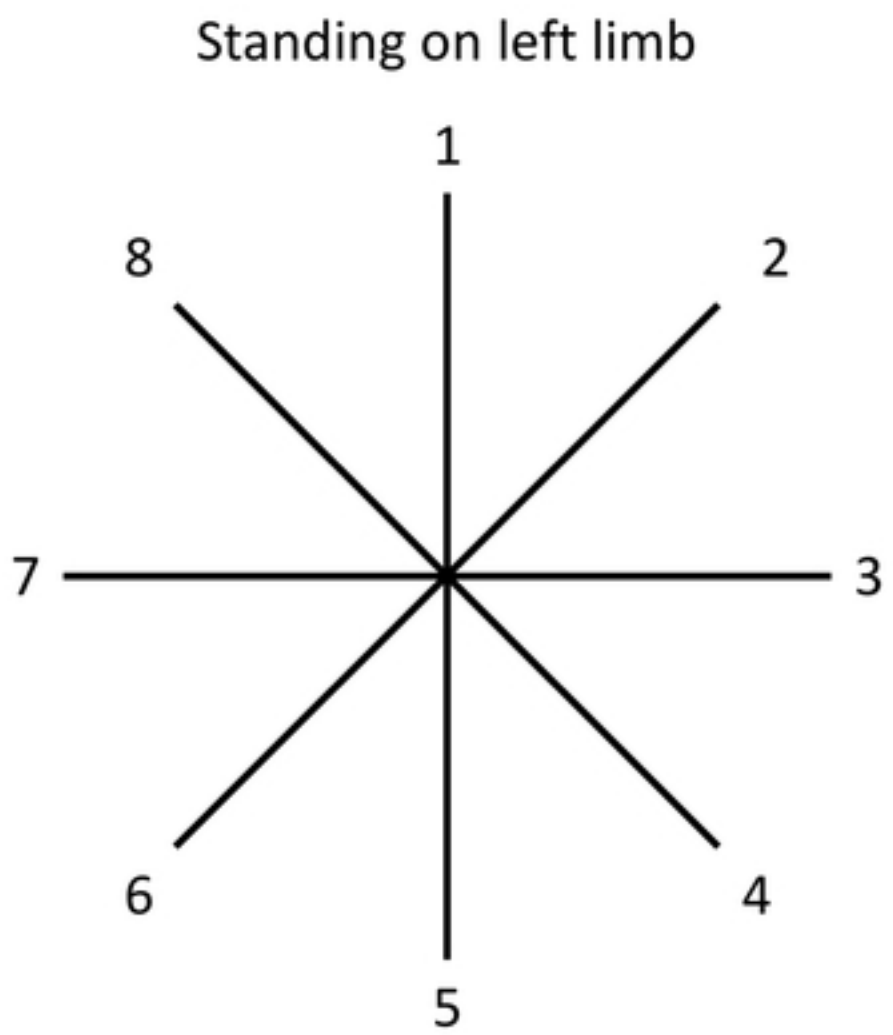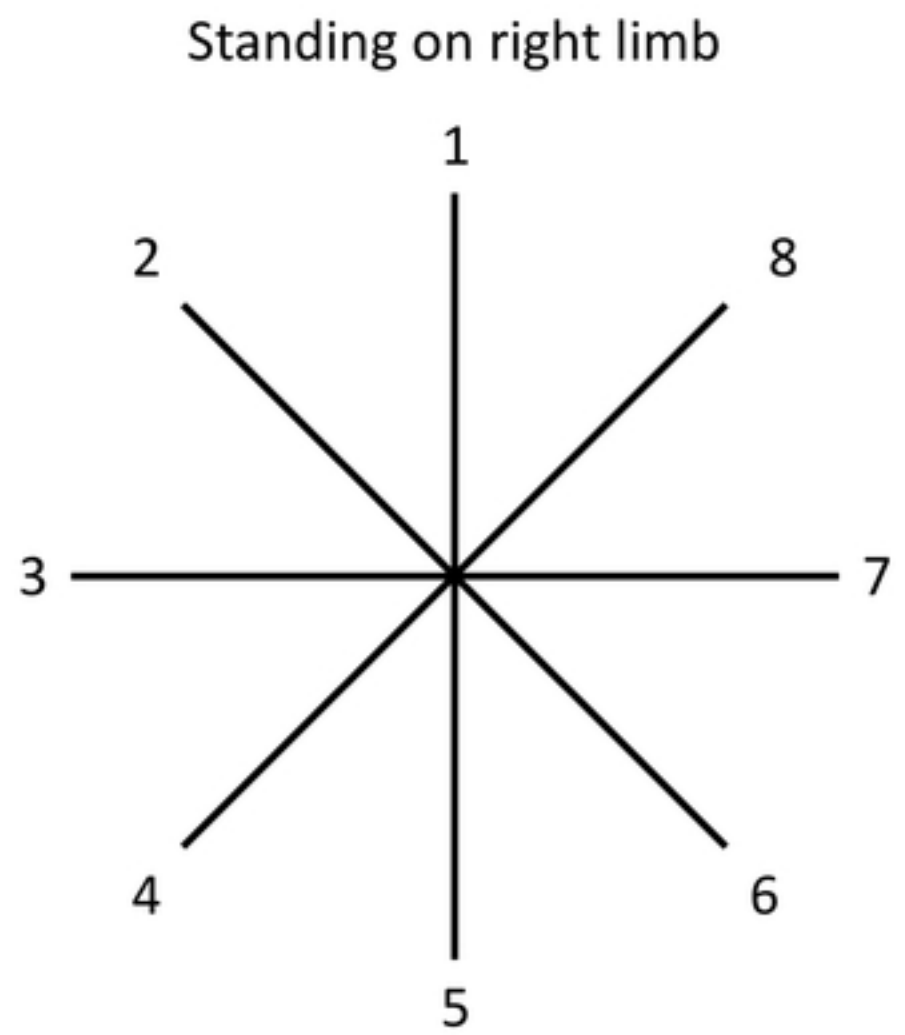

- |                  |                   |
|------------------|-------------------|
| 1. Anterior      | 5. Posterior      |
| 2. Anteromedial  | 6. Posterolateral |
| 3. Medial        | 7. Lateral        |
| 4. Posteromedial | 8. Anterolateral  |

Figure 1

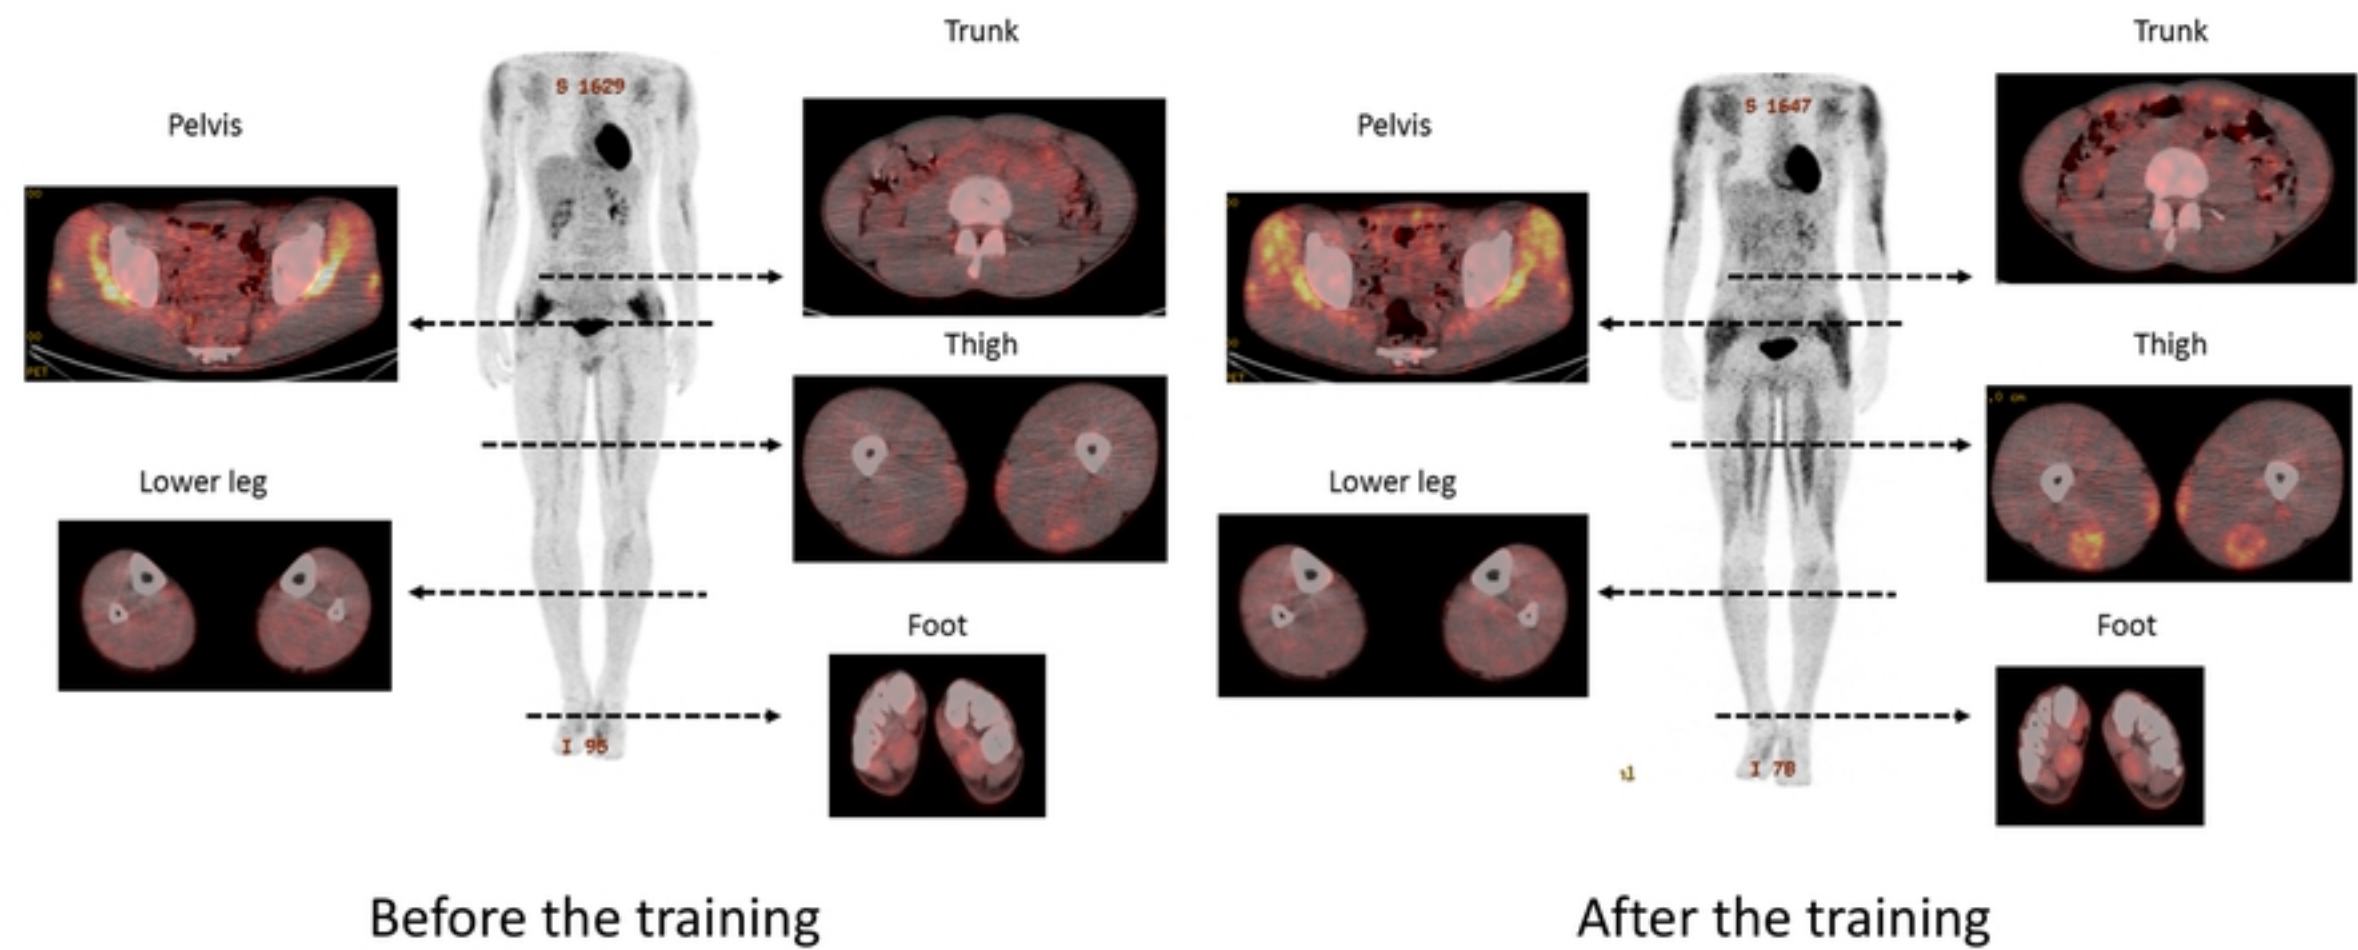

Figure 2
